# Supplementary material for: Kinetic comparison of 13 homogeneous thiol–X reactions
Source: Royal Society of Chemistry journal article supplement (doi:10.1039/c3py00743j), 2013-01-01
Supplement: c3py00743j.pdf [file c3py00743j.pdf]

## SUPPORTING INFORMATION

### Kinetic Comparison of 13 Homogeneous Thiol-X Reactions

Le-Thu T. Nguyen,\* M. Talha Gokmen, Filip E. Du Prez\*

#### Contents

|                                                                                                                            |    |
|----------------------------------------------------------------------------------------------------------------------------|----|
| I. Methods .....                                                                                                           | 2  |
| II. Reagents .....                                                                                                         | 2  |
| III. Online FT-IR study .....                                                                                              | 3  |
| III. 1. Assignment of IR bands .....                                                                                       | 3  |
| III. 2. Illustration of FT-IR waterfall plots .....                                                                        | 4  |
| III. 3. FT-IR spectra of thiol-X reactions .....                                                                           | 5  |
| IV. Electrophilic indexes .....                                                                                            | 14 |
| V. LC-MS spectra .....                                                                                                     | 15 |
| VI. <sup>1</sup> H NMR spectra .....                                                                                       | 17 |
| VII. Comparison of the rates of the reactions of <i>n</i> -octylamine with vinyl sulfone and acrylate in DMF and DMSO..... | 20 |
| References .....                                                                                                           | 20 |

## I. Methods

Time-resolved online ATR FT-IR spectra were recorded on a React-IR 4000 Instrument (Mettler Toledo AutoChem ReactIR) equipped with a silicon ATR probe (SiComp, optical range 4400–650 cm<sup>-1</sup>). For online monitoring, the silicon probe was introduced into a two-necked glass flask containing the reaction mixture under stirring and spectra were recorded every minute or every 15 seconds. A few spectra were recorded before initiation of reactions by addition of catalyst or UV irradiation. The solvent spectrum was recorded and subtracted to enhance the signal of the reaction species. <sup>1</sup>H NMR spectra were recorded on a Bruker Avance 300 at 300 MHz. An Agilent technologies 1100 series LC/MSD system equipped with a diode array detector and single quad MS detector (VL) with an electrospray source (ESI-MS) was used for classic reversed phase LC-MS (liquid chromatography mass spectroscopy) analysis.

## II. Reagents

Isooctyl 3-mercaptopropionate (the thiol, 1) (≥ 99%), 1-octene (2) (98%), 2-norbornene (3) (99%), *N*-methyl maleimide (4) (97%), ethyl vinyl sulfone (5) (98%), butyl acrylate (6) (≥99%, contains 10-60 ppm monomethyl ether hydroquinone as inhibitor), butyl methacrylate (7) (99%, contains 10 ppm monomethyl ether hydroquinone as inhibitor), *N,N*-dimethylacrylamide (8) (99%, contains 500 ppm monomethyl ether hydroquinone as inhibitor), 2-isopropenyl-2-oxazoline (10) (99%), methyl 2-bromopropionate (11) (99%), 1,2-epoxybutane (12) (99%), *N*-tosylaziridine (13) (98%), hexyl isocyanate (14) (97%), hexyl isothiocyanate (15) (95%), triethylamine (≥ 99%), dimethylphenylphosphine (99%), 2,2-dimethoxy-2-phenylacetophenone (photoinitiator, 99%), 1,8-diazabicyclo[5.4.0]undec-7-ene (DBU, 98%), *n*-octylamine (99%), *N,N*-dimethylformamide (HPLC type, ≥ 99.9%), dimethyl sulfoxide (≥ 99.9%) and chloroform (≥ 99.9%) were purchased from Sigma-Aldrich and used as received. *N*-Isopropylacrylamide (9) (97%) was purchased from Aldrich and recrystallized twice.

### III. Online FT-IR study

#### III. 1. Assignment of IR bands

Table S1. IR bands monitored during the thiol-X reactions

| Thiol (1 eq)                                                                                                                                  | Class            | Reactant (1 eq)                                                                                  | Product                                                                             | Band centers of monitored IR bands (cm <sup>-1</sup> )<br>And their tentatively assigned vibrations |                                                                       |
|-----------------------------------------------------------------------------------------------------------------------------------------------|------------------|--------------------------------------------------------------------------------------------------|-------------------------------------------------------------------------------------|-----------------------------------------------------------------------------------------------------|-----------------------------------------------------------------------|
| 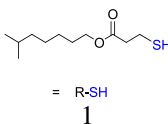<br>= R-SH<br><b>1</b><br>SH stretch 2550 cm <sup>-1</sup> | Radical mediated | 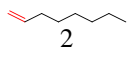<br><b>2</b>    | 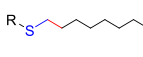   | 1000, 919<br>CH <sub>2</sub> =CH deformation (twist and wag)                                        | 1295<br>S-CH <sub>2</sub> out-of-plane bend                           |
|                                                                                                                                               |                  | 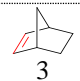<br><b>3</b>    | 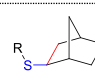   | 714<br>=CH wag                                                                                      | 1300<br>S-CH <sub>2</sub> out-of-plane bend                           |
|                                                                                                                                               |                  | 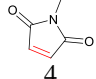<br><b>4</b>    | 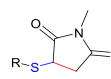   | 834<br>=CH wag                                                                                      | 1281<br>S-CH <sub>2</sub> out-of-plane bend                           |
|                                                                                                                                               | Michael addition | 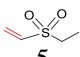<br><b>5</b>    | 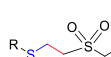   | 984, 799, 760<br>CH=CH <sub>2</sub> bend                                                            | 1350<br>S-CH <sub>2</sub> out-of-plane bend                           |
|                                                                                                                                               |                  | 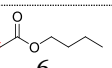<br><b>6</b>   | 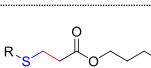  | 1297, 1278; 987, 968; 814<br>=CH rock; CH=CH <sub>2</sub> wag ;<br>=CH <sub>2</sub> twist           | 1343, 1242<br>S-CH <sub>2</sub> out-of-plane bend                     |
|                                                                                                                                               |                  | 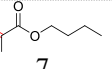<br><b>7</b>  | 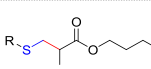 | 946<br>=CH <sub>2</sub> wag                                                                         | 1239<br>S-CH <sub>2</sub> out-of-plane bend                           |
|                                                                                                                                               |                  | 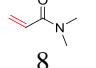<br><b>8</b>  | 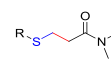 | 984, 961, 799<br>CH=CH <sub>2</sub> out-of-plane deformation                                        | -                                                                     |
|                                                                                                                                               |                  | 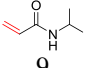<br><b>9</b>  | 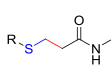 | 991, 960<br>CH=CH <sub>2</sub> out-of-plane deformation                                             | -                                                                     |
|                                                                                                                                               |                  | 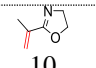<br><b>10</b> | 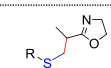 | 990, 930<br>=CH <sub>2</sub> out-of-plane deformation                                               | -                                                                     |
|                                                                                                                                               |                  | 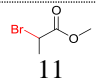<br><b>11</b> | 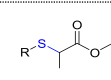 | -                                                                                                   | -                                                                     |
|                                                                                                                                               | Three memb. ring | 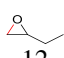<br><b>12</b> | 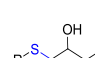 | -                                                                                                   | -                                                                     |
|                                                                                                                                               |                  | 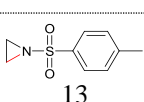<br><b>13</b> | 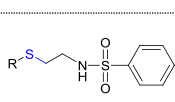 | 910, 713, 695<br>ring deformation and CH <sub>2</sub> rock                                          | -                                                                     |
|                                                                                                                                               | Iso(thio)cyanate | 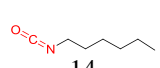<br><b>14</b> | 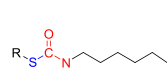 | 2280<br>N=C=O stretch                                                                               | 1536, 1214<br>amide II (mainly δN-H, νC-N),<br>amide III (δN-H, νC-C) |
|                                                                                                                                               |                  | 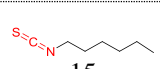<br><b>15</b> | 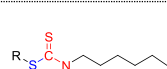 | 2179-2105<br>N=C=S stretch                                                                          | 1540, 964-931<br>thioamide (mainly νC-N), thioamide (δN-H)            |

-signals that are blended under other bands in the fingerprint region and thus cannot be distinguished.

### III. 2. Illustration of FT-IR waterfall plots

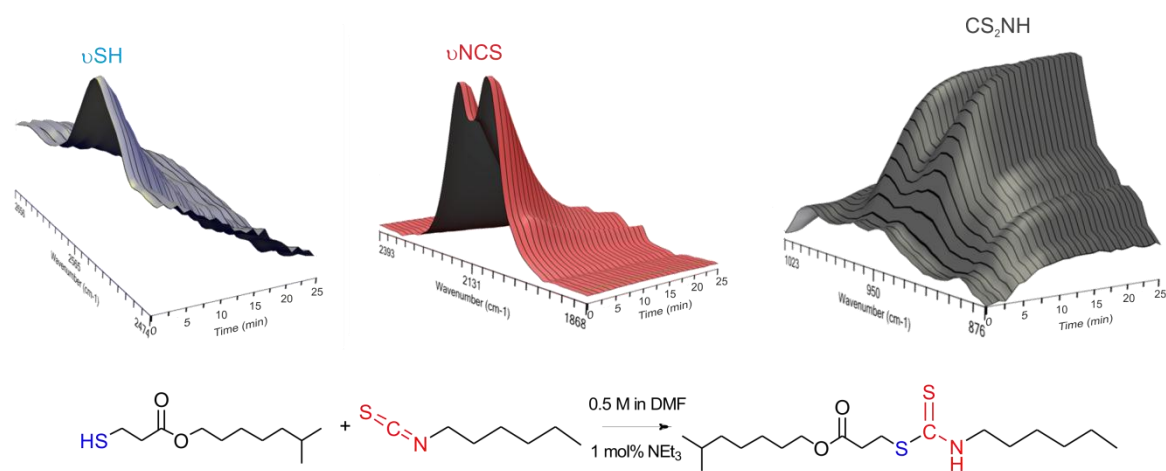

Fig. S1. Illustration of the online FT-IR waterfall plots for the thiol-isothiocyanate reaction.

### III. 3. FT-IR spectra of thiol-X reactions

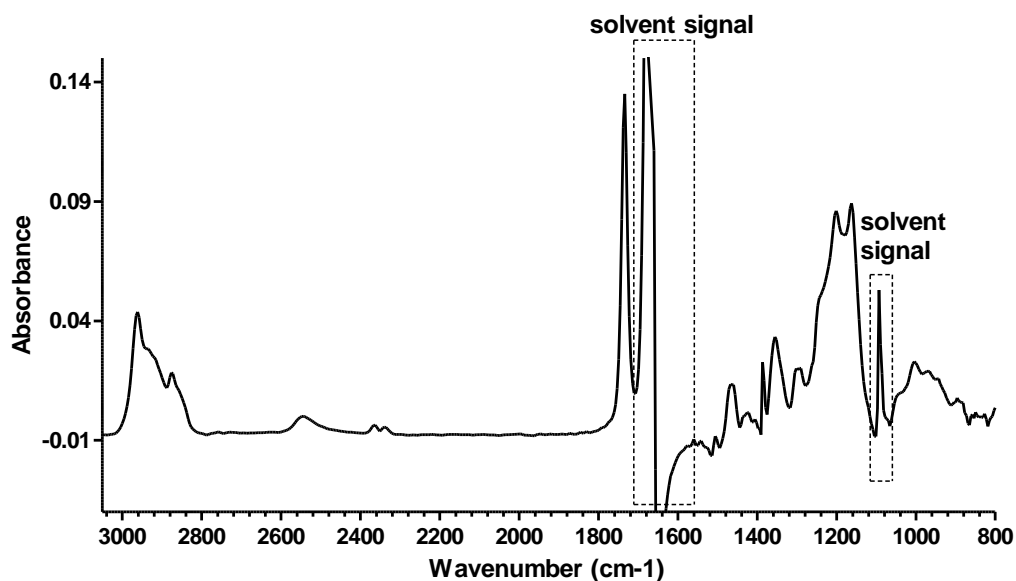

Fig. S2. IR spectrum of a 0.5 M solution of the thiol in DMF after solvent signal subtraction. Because of the high absorption of the solvent signals at 1715-1600 and 1100-1070 cm<sup>-1</sup>, these signals still appear in the subtracted spectrum.

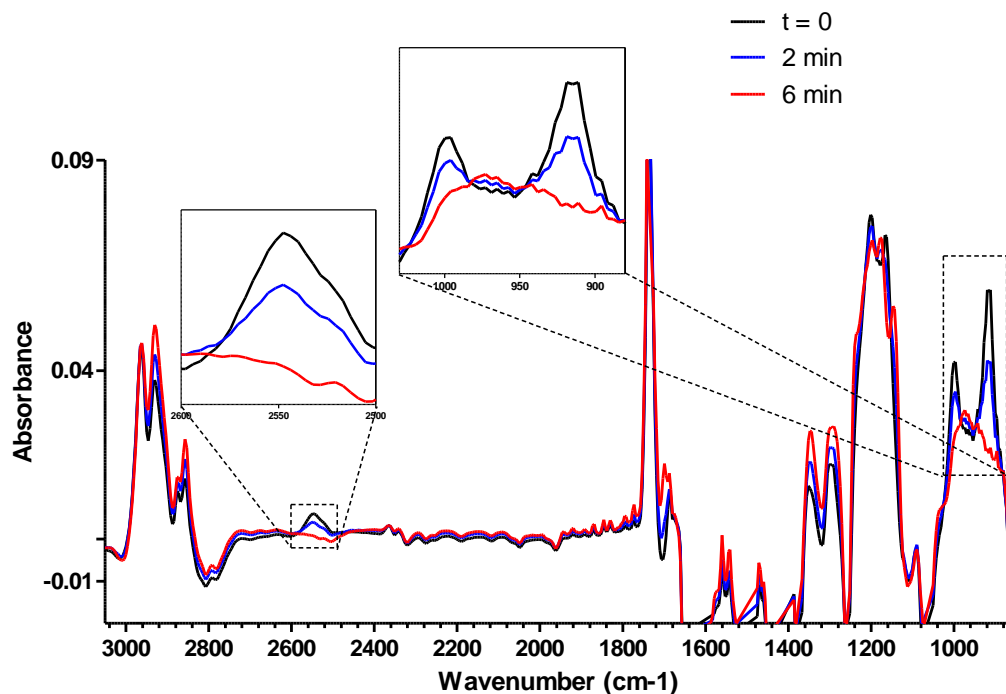

Fig. S3. Illustration of online IR spectra for the reaction between the thiol (1) and 1-octene (2) at 0.5 M concentration in DMF with 1 mol% of photoinitiator. Insets: zooms of the thiol and double bond peak regions.

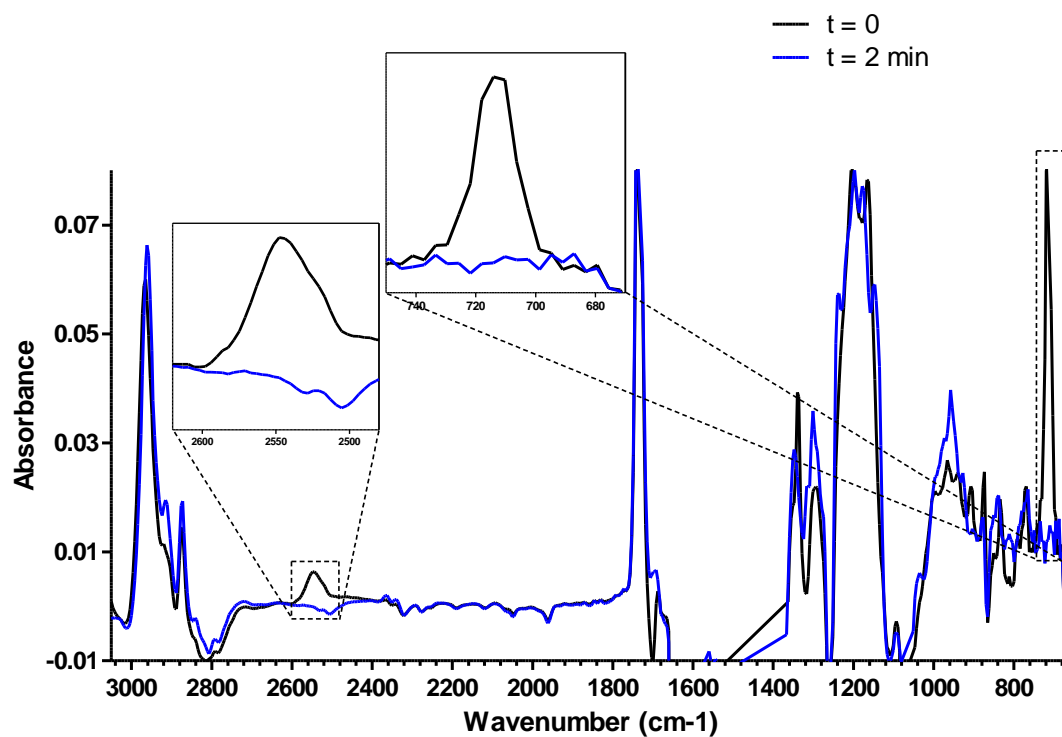

Fig. S4. Illustration of online IR spectra for the reaction between the thiol (1) and 2-norbornene (3) at 0.5 M concentration in DMF with 1 mol% photoinitiator. Insets: zooms of the thiol and double bond peak regions.

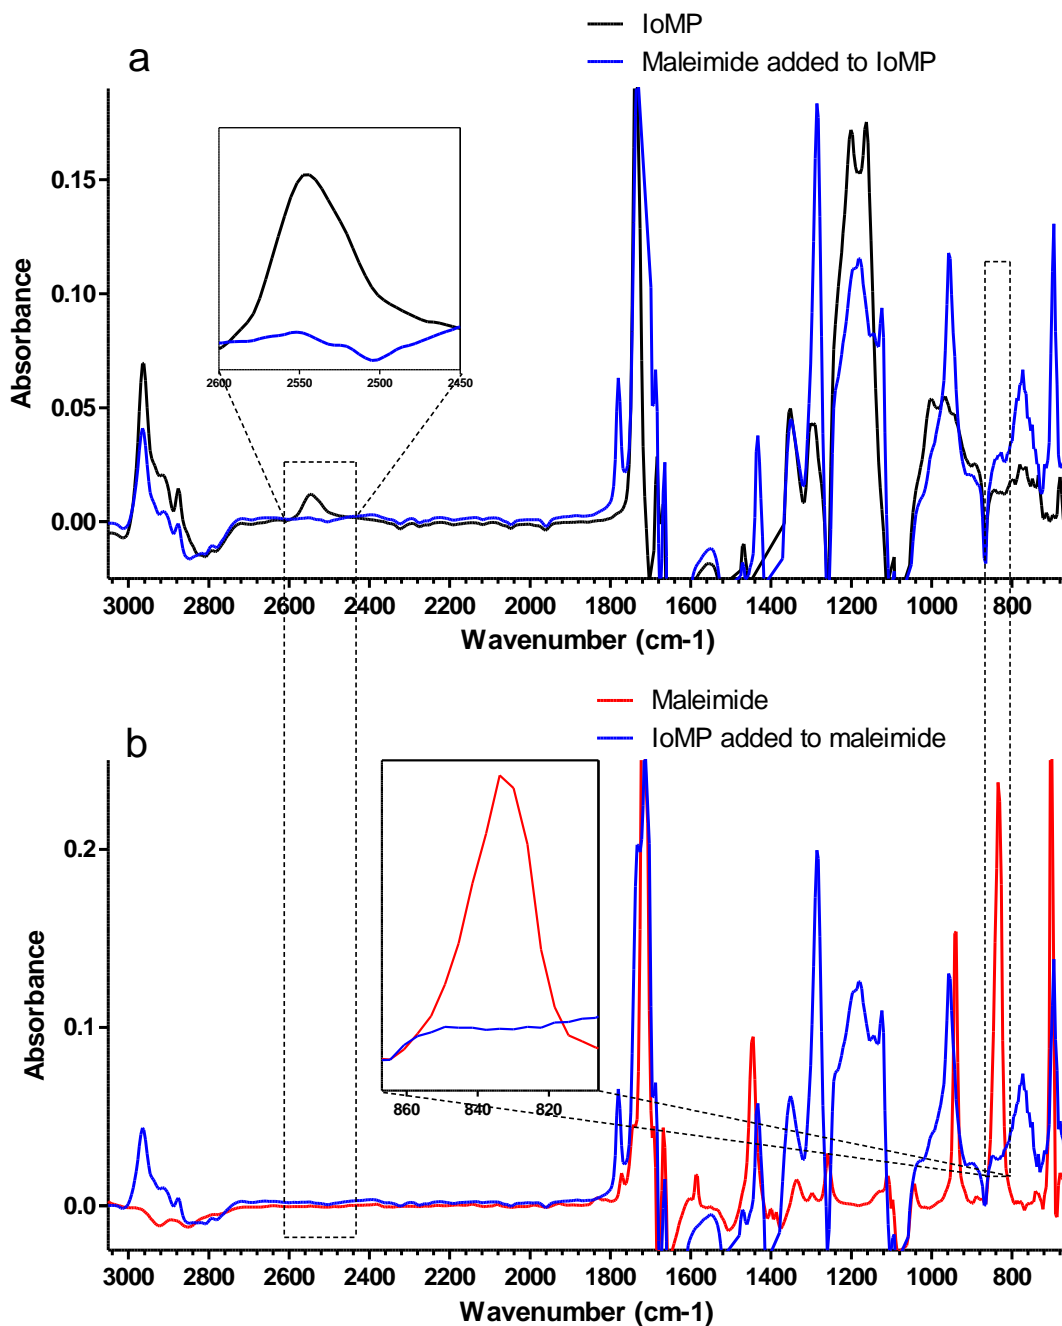

Fig. S5. IR spectra for the reaction between the thiol (1) and maleimide (4) in a 0.5 M solution of IoMP in DMF without any catalyst before and right after addition of the second reactant: a) maleimide added to thiol and b) thiol added to maleimide. In both cases the reaction was complete before the kinetic profile could be measured (spectra were recorded every minute). Insets: zooms of the thiol and double bond peak regions.

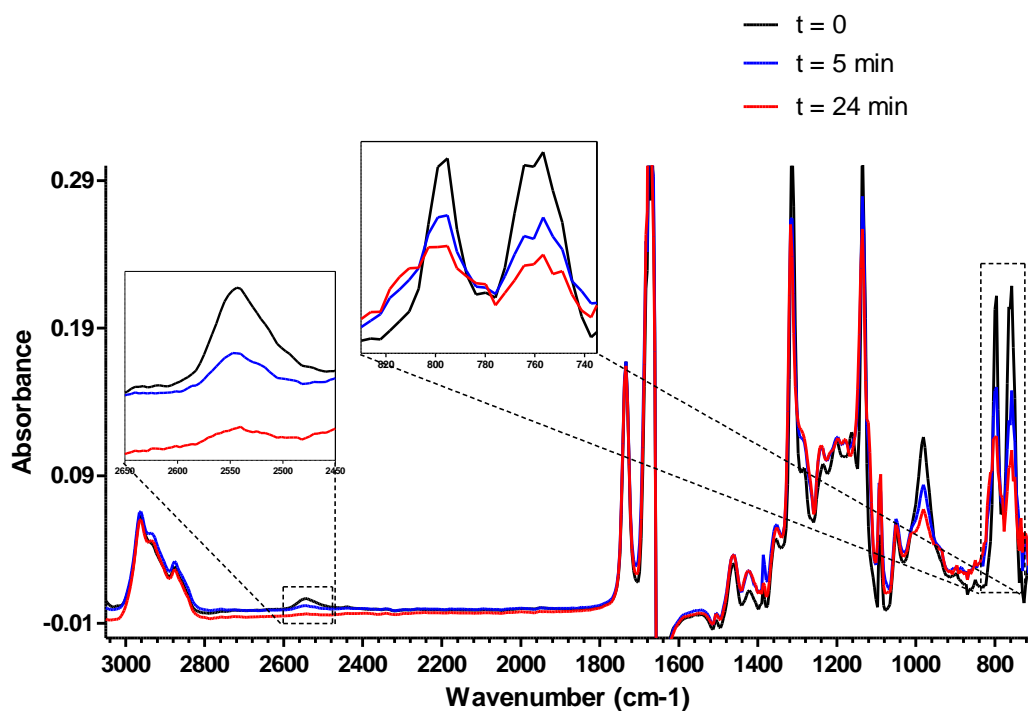

Fig. S6. Illustration of online IR spectra for the reaction between the thiol (1) and vinyl sulfone (5) at 0.5 M concentration in DMF with 1 mol% of  $\text{NEt}_3$ . Insets: zooms of the thiol and double bond peak regions.

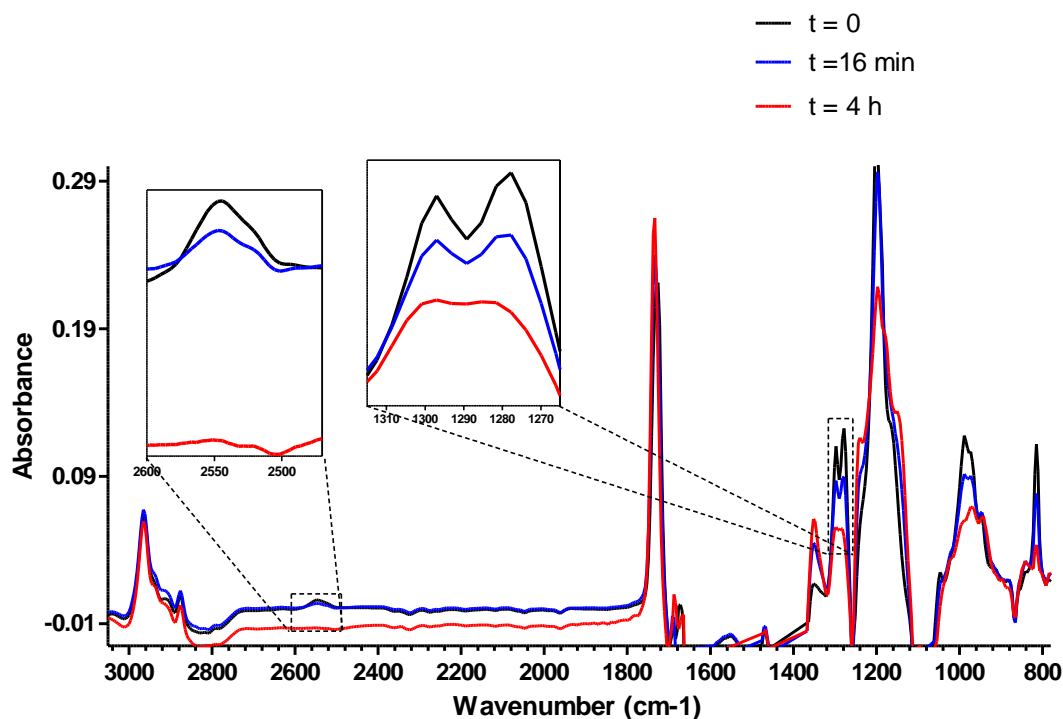

Fig. S7. Illustration of online IR spectra for the reaction between the thiol (1) and acrylate (6) in a 0.5 M solution of the thiol in DMF with 1 mol% of  $\text{NEt}_3$ . Insets: zooms of the thiol and double bond peak regions.

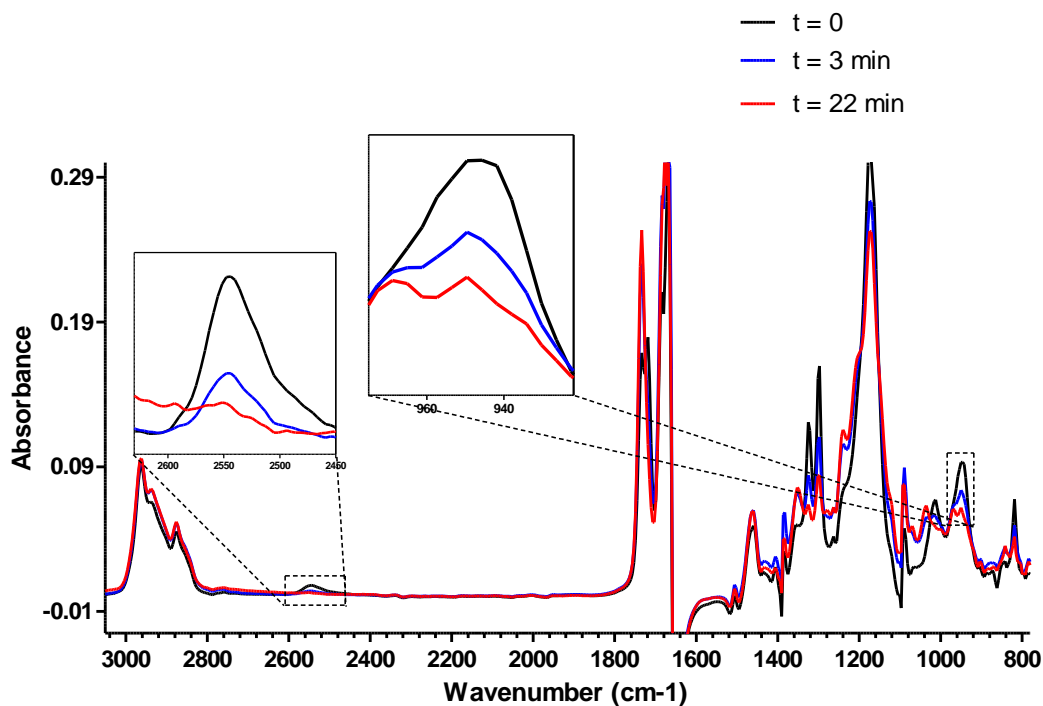

Fig. S8. Illustration of online IR spectra for the reaction between the thiol (1) and methacrylate (7) in a 0.5 M solution of the thiol in DMF with 1 mol% of DBU. Insets: zooms of the thiol and double bond peak regions.

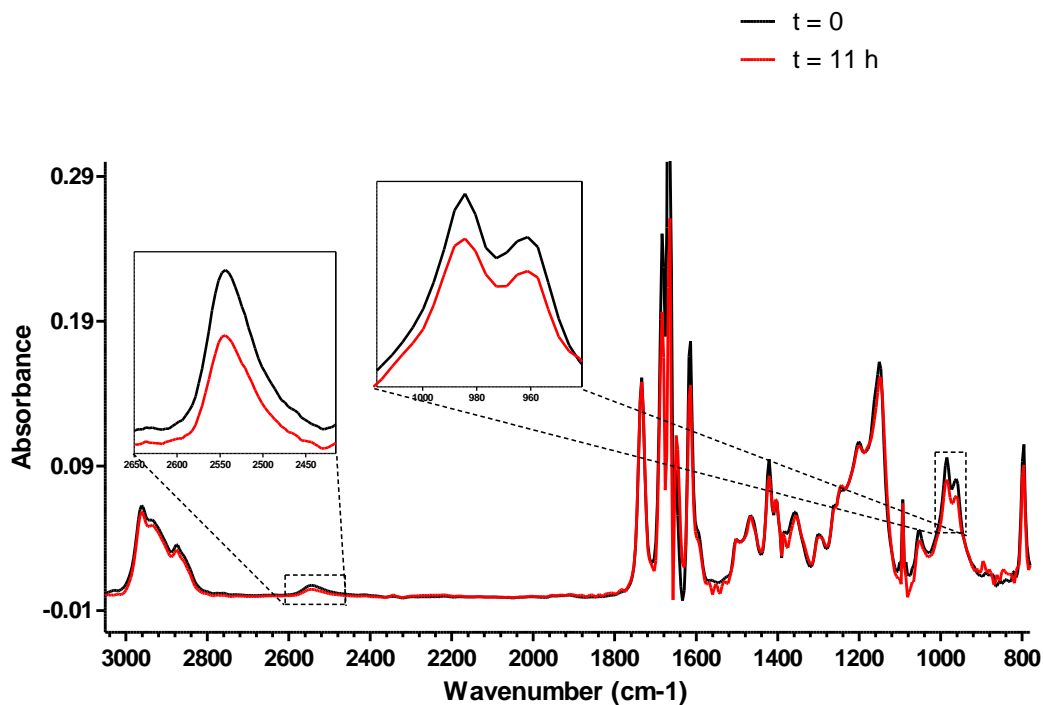

Fig. S9. Illustration of online IR spectra for the reaction between the thiol (1) and *N,N*-dimethylacrylamide (8) at 0.5 M concentration in DMF with 1 mol% of NEt<sub>3</sub>. Insets: zooms of the thiol and double bond peak regions.

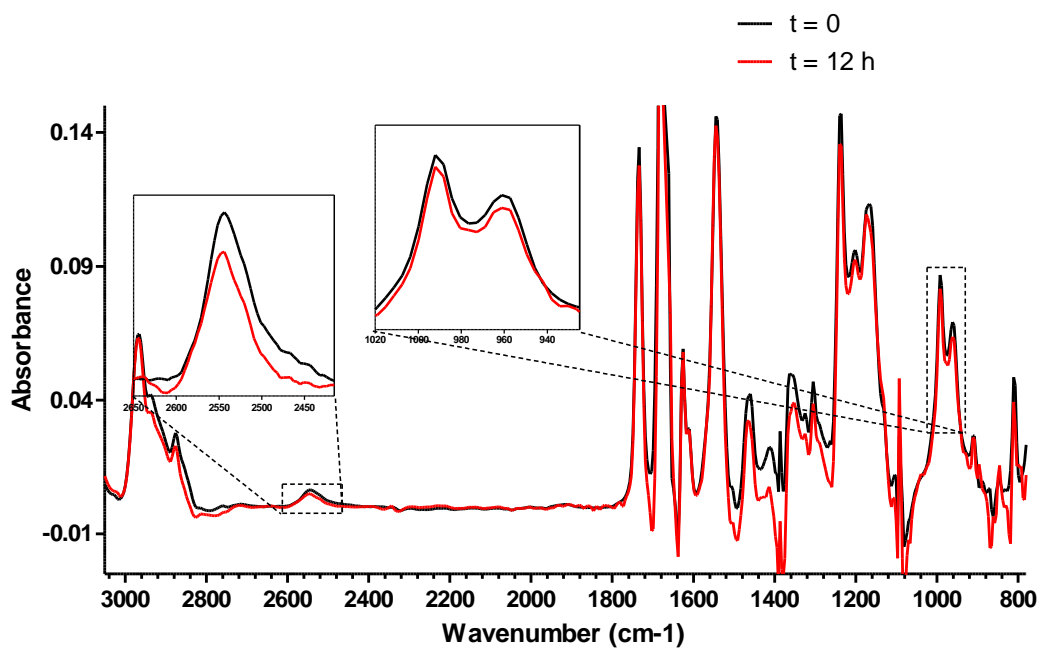

Fig. S10. Illustration of online IR spectra for the reaction between the thiol (1) and *N*-isopropylacrylamide (9) at 0.5 M concentration in DMF with 1 mol% of NEt<sub>3</sub>. Insets: zooms of the thiol and double bond peak regions.

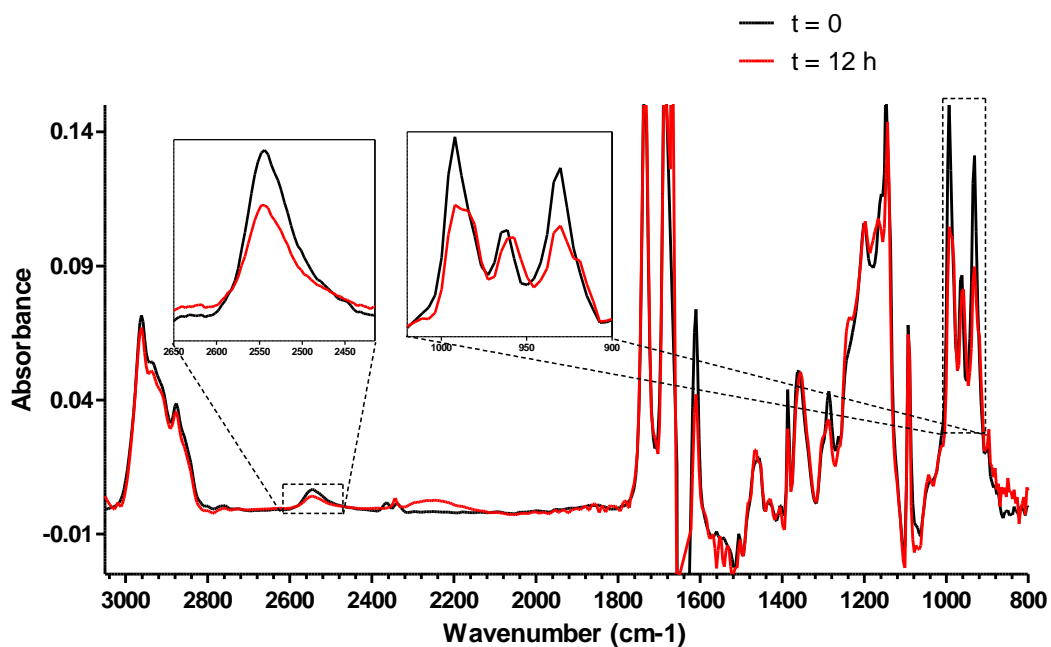

Fig. S11. Illustration of online IR spectra for the reaction between the thiol (1) and isopropenyl oxazoline (10) in at 0.5 M concentration in DMF with 1 mol% of the phosphine. Insets: zooms of the thiol and double bond peak regions.

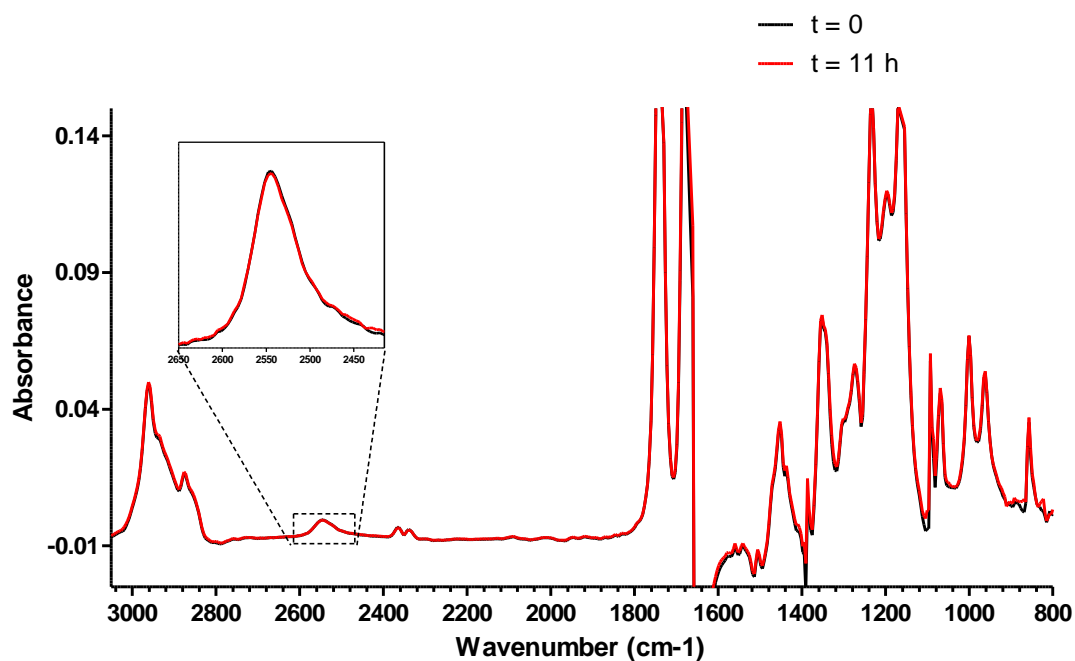

Fig. S12. Illustration of online IR spectra for the reaction between the thiol and methyl  $\alpha$ -bromopropionate (11) at 0.5 M concentration in DMF with 1 mol% of DBU. Inset: zoom of the thiol peak region.

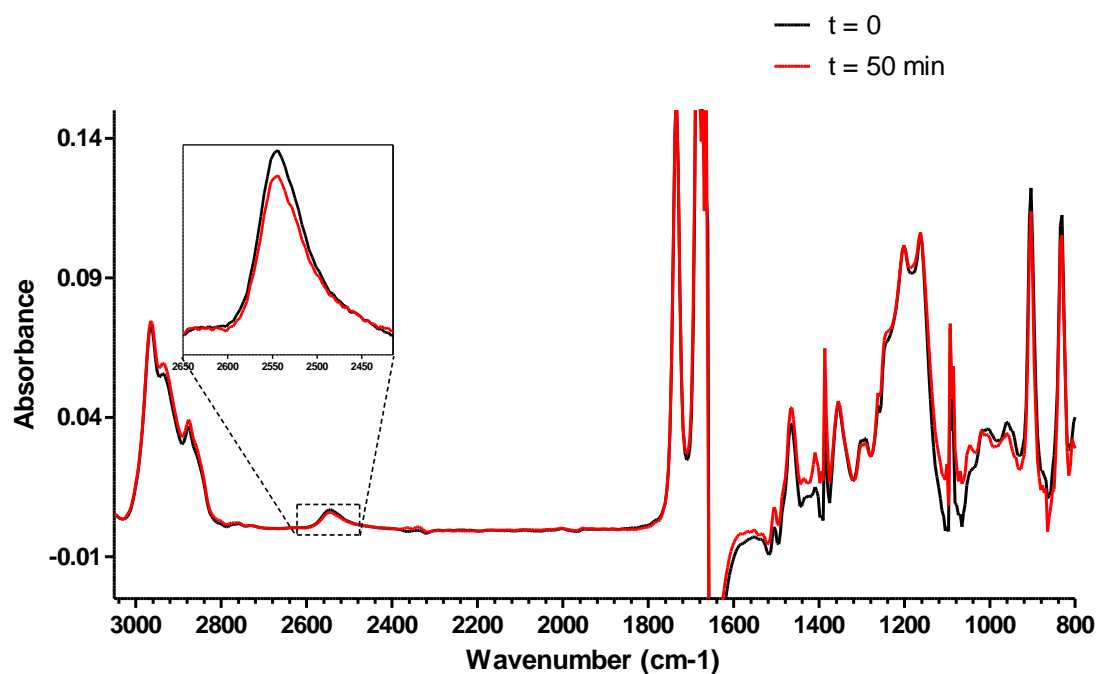

Fig. S13. Illustration of online IR spectra for the reaction between the thiol (1) and epoxy (12) at 0.5 M concentration in DMF with 1 mol% of DBU. Inset: zoom of the thiol peak region.

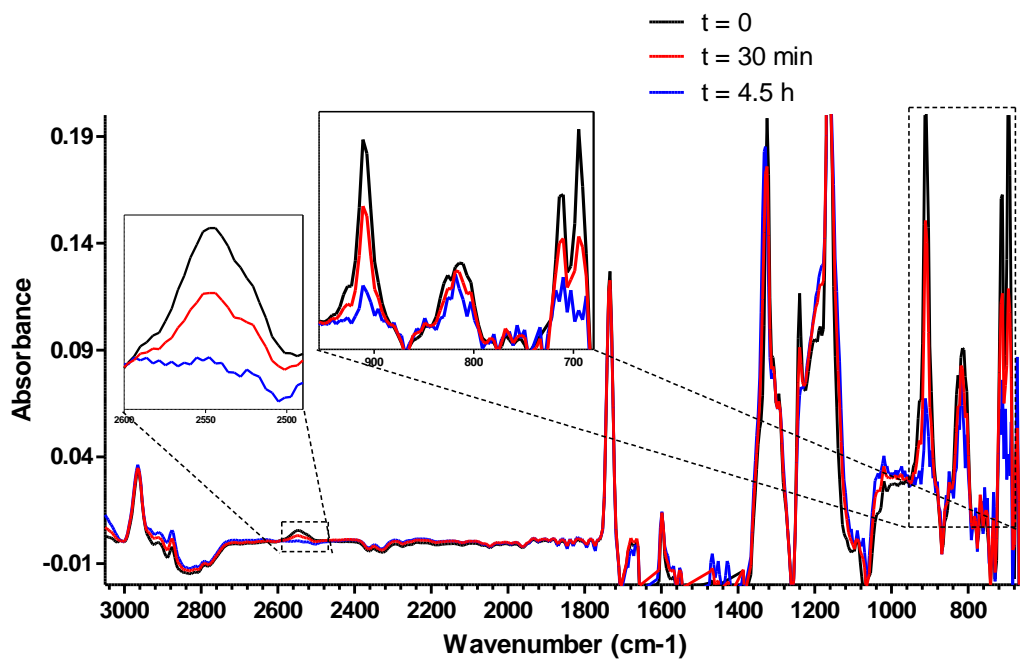

Fig. S14. Illustration of online IR spectra for the reaction between the thiol (1) and *N*-tosyl aziridine (13) at 0.5 M concentration in DMF with 1 mol% of phosphine. Insets: zooms of the thiol and aziridine ring peak region.

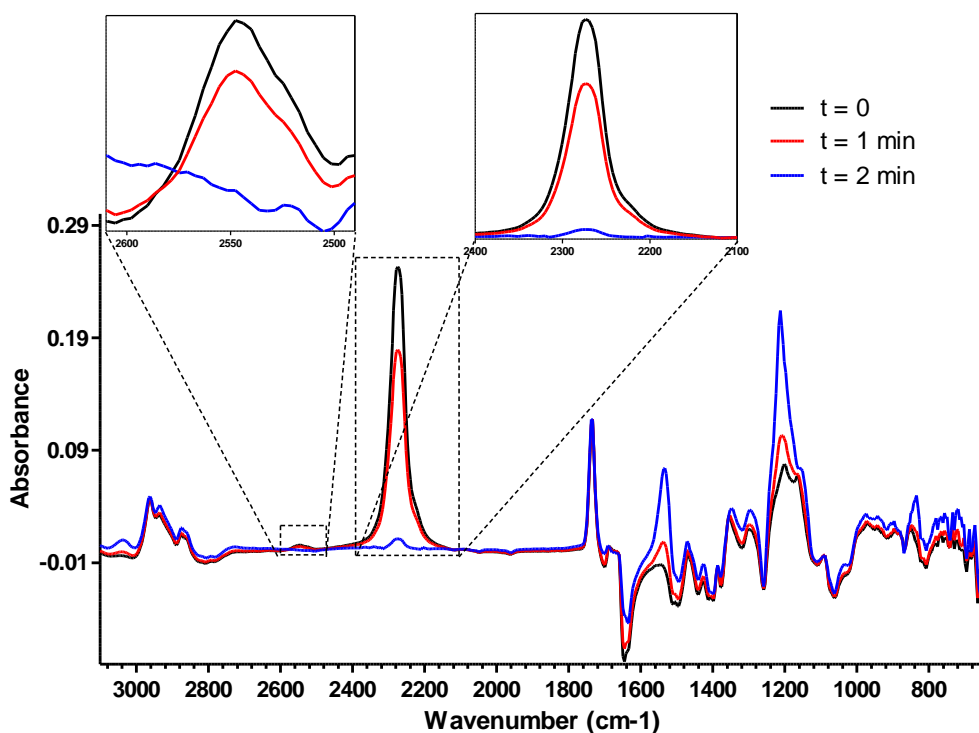

Fig. S15. Illustration of online IR spectra for the reaction between the thiol (1) and isocyanate (14) at 0.5 M concentration in DMF with 1 mol% of  $\text{NEt}_3$ . Insets: zooms of the thiol and NCO peak region.

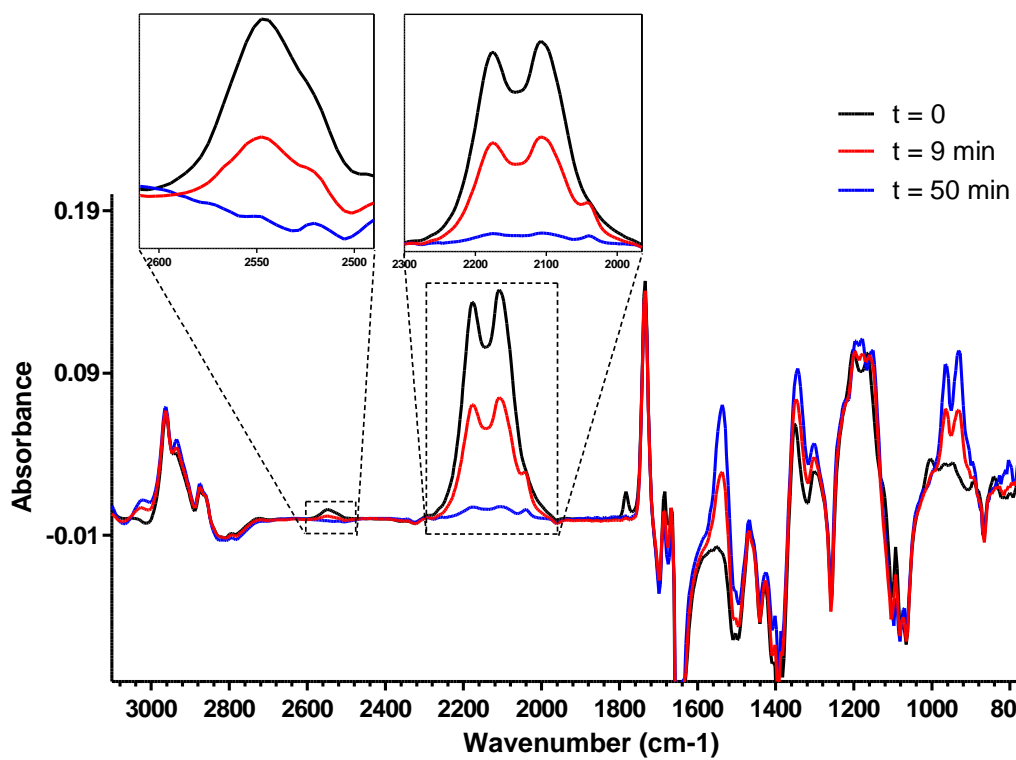

Fig. S16. Illustration of online IR spectra for the reaction between the thiol (1) and isothiocyanate (15) at 0.5 M concentration in DMF with 1 mol% of  $\text{NEt}_3$ . Insets: zooms of the thiol and NCS peak region.

#### IV. Electrophilic indexes

The simulated electrophilic index of acrylamide is higher than those of ethyl methacrylate and methyl acrylate, as reported by LoPachin et al.<sup>[1]</sup>

Though outside of the scope of this paper, our calculations by density functional theory using Gaussian 03 suggested that *N*-isopropylacrylamide has a smaller electrophilic index compared to ethyl vinyl sulfone.

##### Calculations of the electrophilic indexes of *N*-isopropylacrylamide and ethyl vinyl sulfone

The structures of *N*-isopropylacrylamide and ethyl vinyl sulfone were optimized from ground state equilibrium with density functional theory calculations DFT B3LYP/6-31G(d) using the Gaussian 03 software. The calculation of the electronic chemical potential ( $\mu$ ) and the chemical hardness ( $\eta$ ) were obtained from the expressions  $\mu \approx (\epsilon_{\text{HOMO}} + \epsilon_{\text{LUMO}})/2$  and  $\eta \approx \epsilon_{\text{LUMO}} - \epsilon_{\text{HOMO}}$ . The electrophilicity index  $\omega$  is calculated from  $\omega = \mu^2/\eta$ .<sup>[2]</sup>

| Structures                                                                                                              | Calculated $\omega$ (eV) |
|-------------------------------------------------------------------------------------------------------------------------|--------------------------|
| 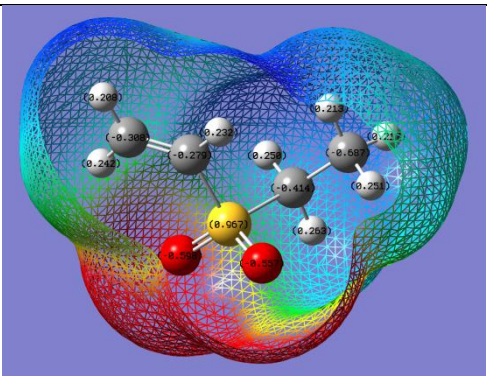 <p>Ethyl vinyl sulfone</p>          | 1.264                    |
| 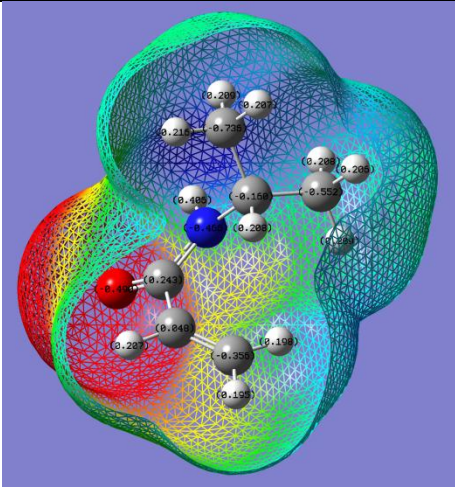 <p><i>N</i>-isopropylacrylamide</p> | 1.073                    |

## V. LC-MS spectra

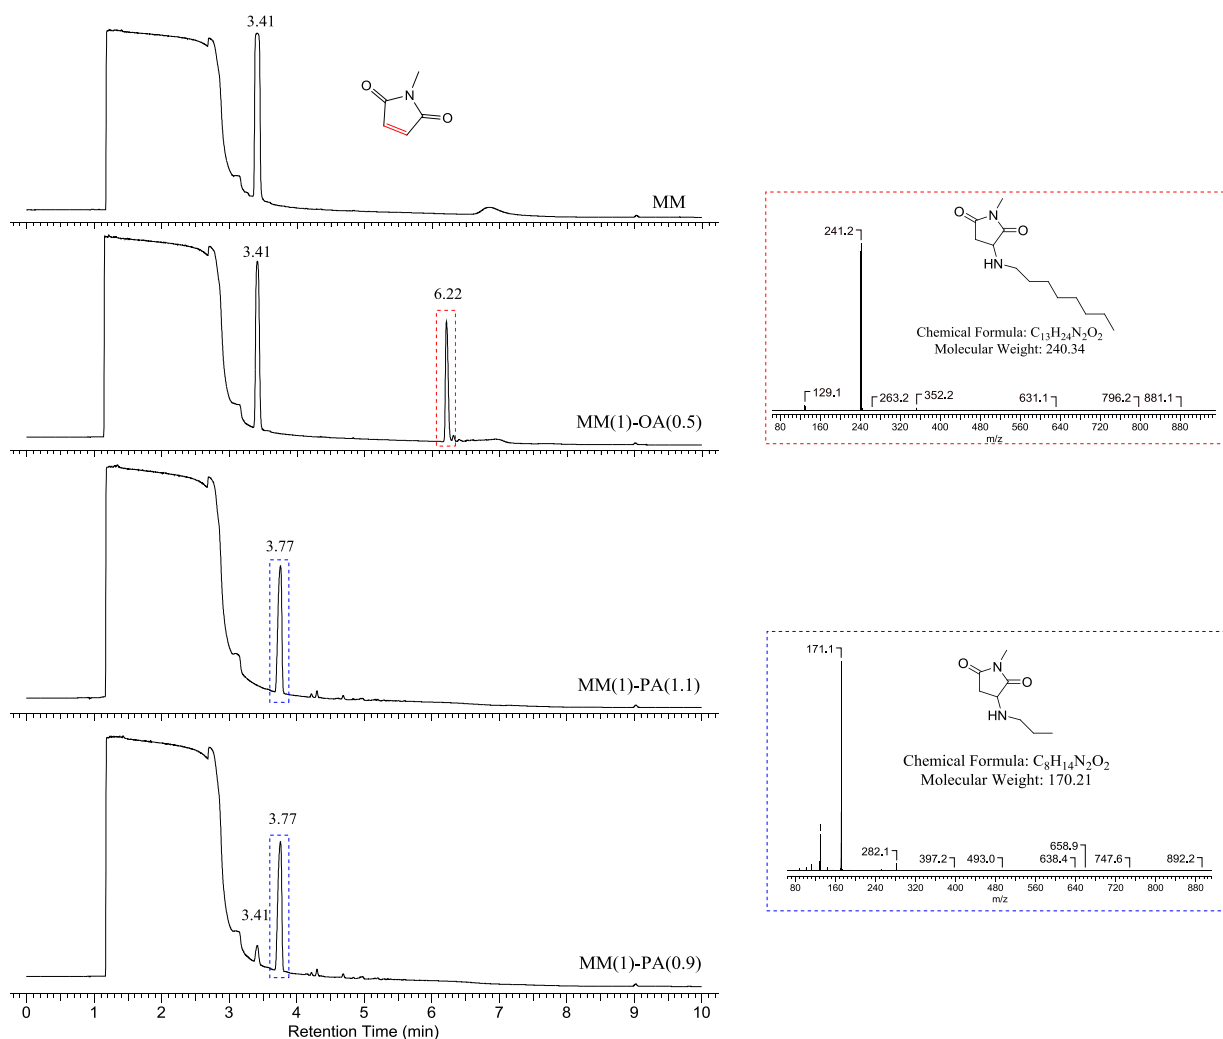

Fig. S17. LC-MS analysis of the reaction mixture of *N*-methyl maleimide (MM) with *n*-octylamine (OA) and *n*-propylamine (PA) in DMF (maleimide concentration of 0.5M) after 15 min, with maleimide:*n*-octylamine equal to 1:0.5 (MM(1)-OA(0.5)), and maleimide:*n*-propylamine equal to 1:1.1 and 1:0.9 (MM(1)-PA(1.1) and MM(1)-PA(0.9), respectively).

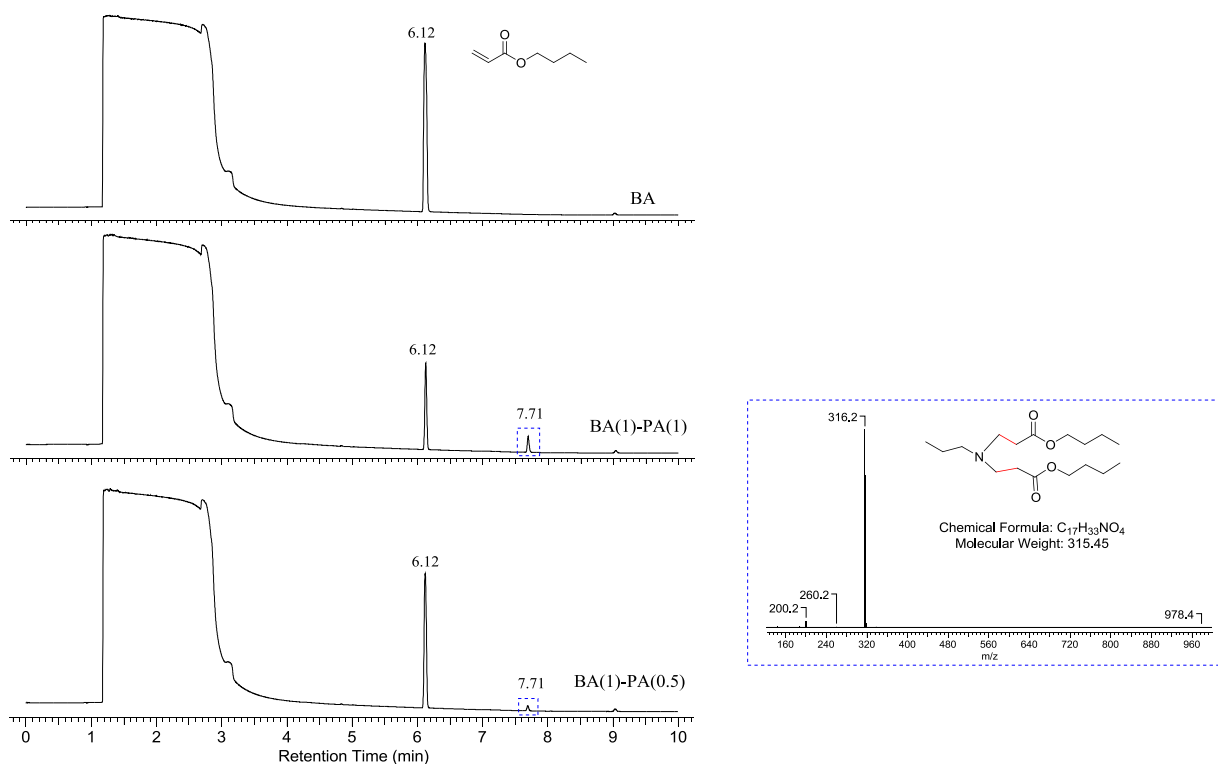

Fig. S18. LC-MS analysis of the reaction mixture of *n*-butyl acrylate (BA) with *n*-proylamine in DMF (BA concentration of 0.5M) after 14 hours, with acrylate:*n*-proylamine equal to 1:1 and 1:0.5 (BA(1)-PA(1) and BA(1)-PA(0.5), respectively).

## VI. $^1\text{H}$ NMR spectra

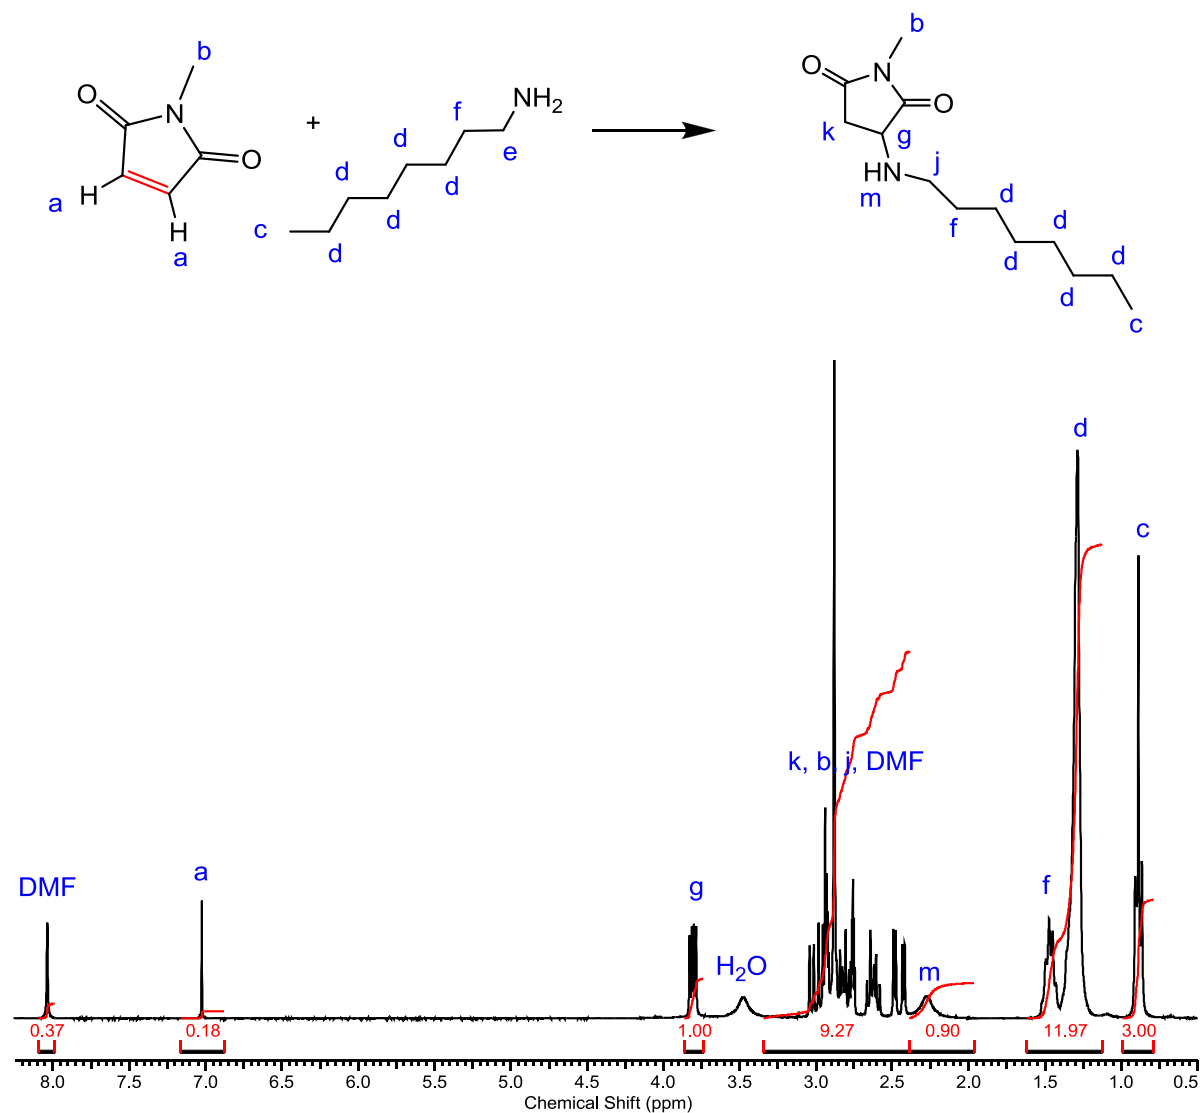

Fig. S19.  $^1\text{H}$  NMR spectrum of the reaction mixture of maleimide and *n*-octylamine with maleimide:*n*-octylamine equal to 1:0.75 in  $\text{DMF-d}_7$  (maleimide concentration of 0.5 M) after 30 minutes.

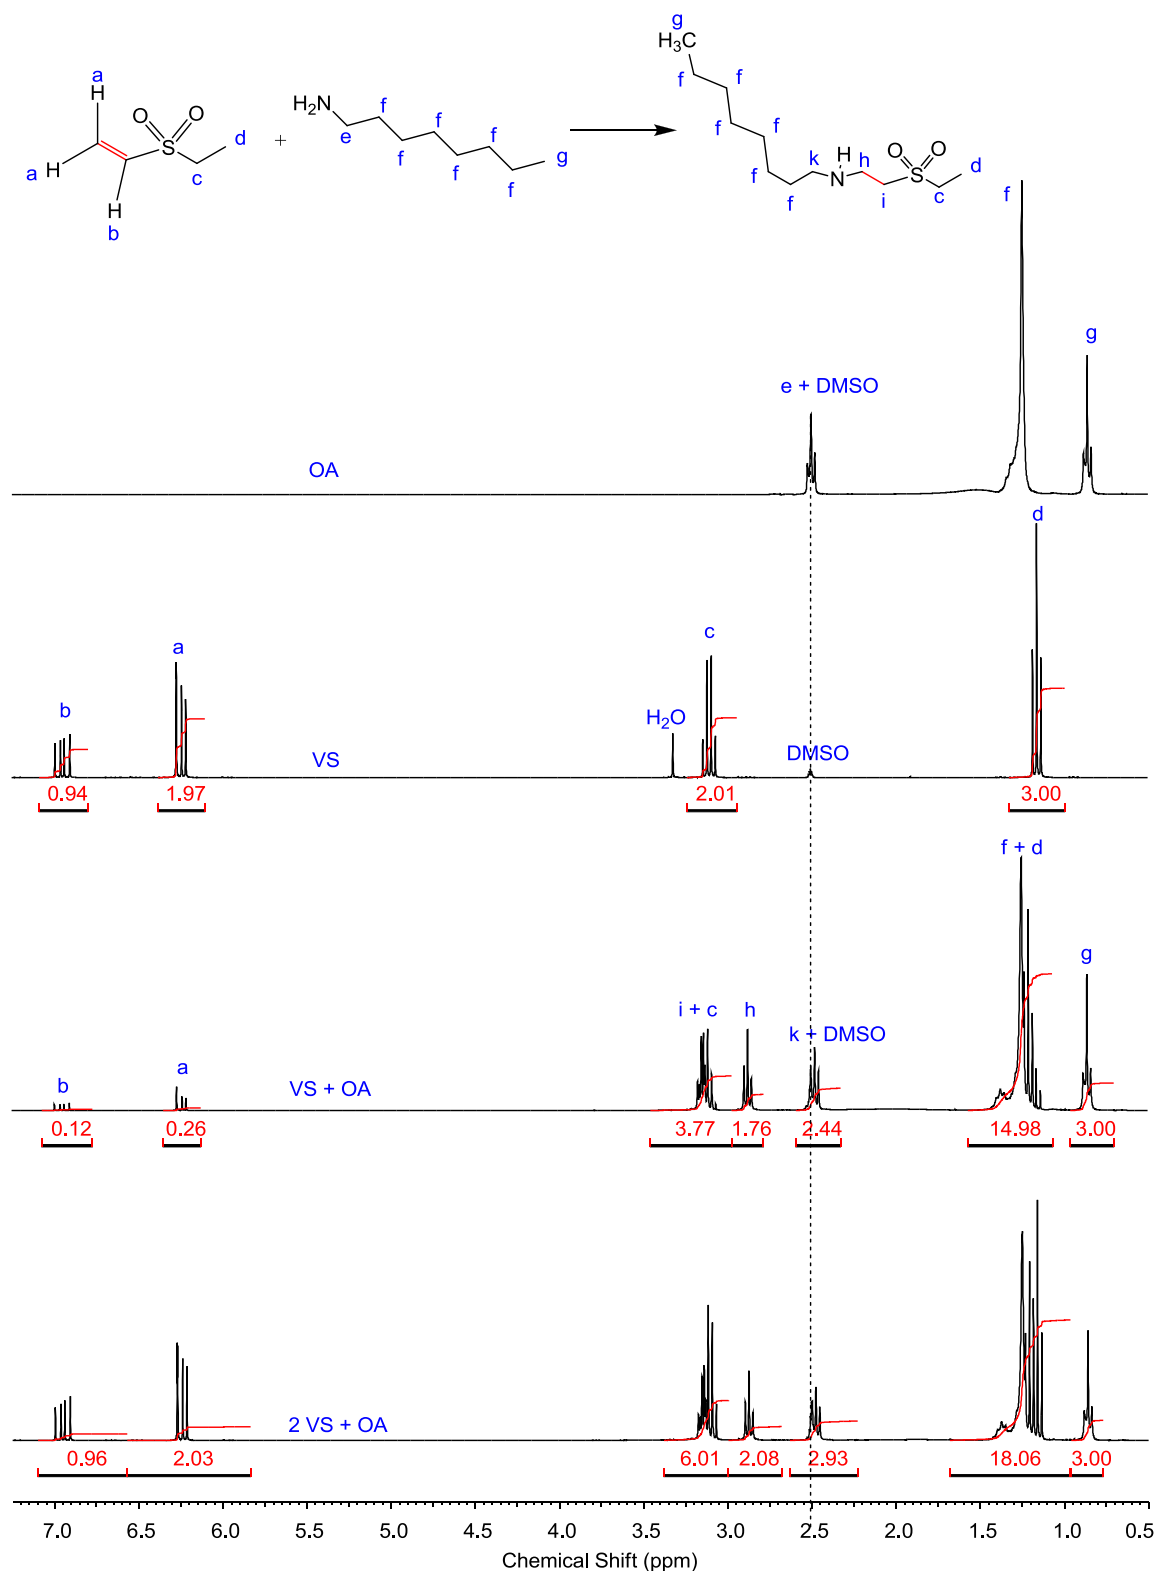

Fig. S20. <sup>1</sup>H NMR spectra of *n*-octylamine (OA), ethyl vinyl sulfone (VS), and the reaction mixture of ethyl vinyl sulfone and *n*-octylamine with vinyl sulfone:*n*-octylamine equal to 1:1 and 2:1 in DMSO-*d*<sub>6</sub> (VS concentration of 0.5M) after 4 hours. 90% and 50% of the vinyl groups were consumed for the (VA + OA) and (2 VA + OA) reactions, respectively.

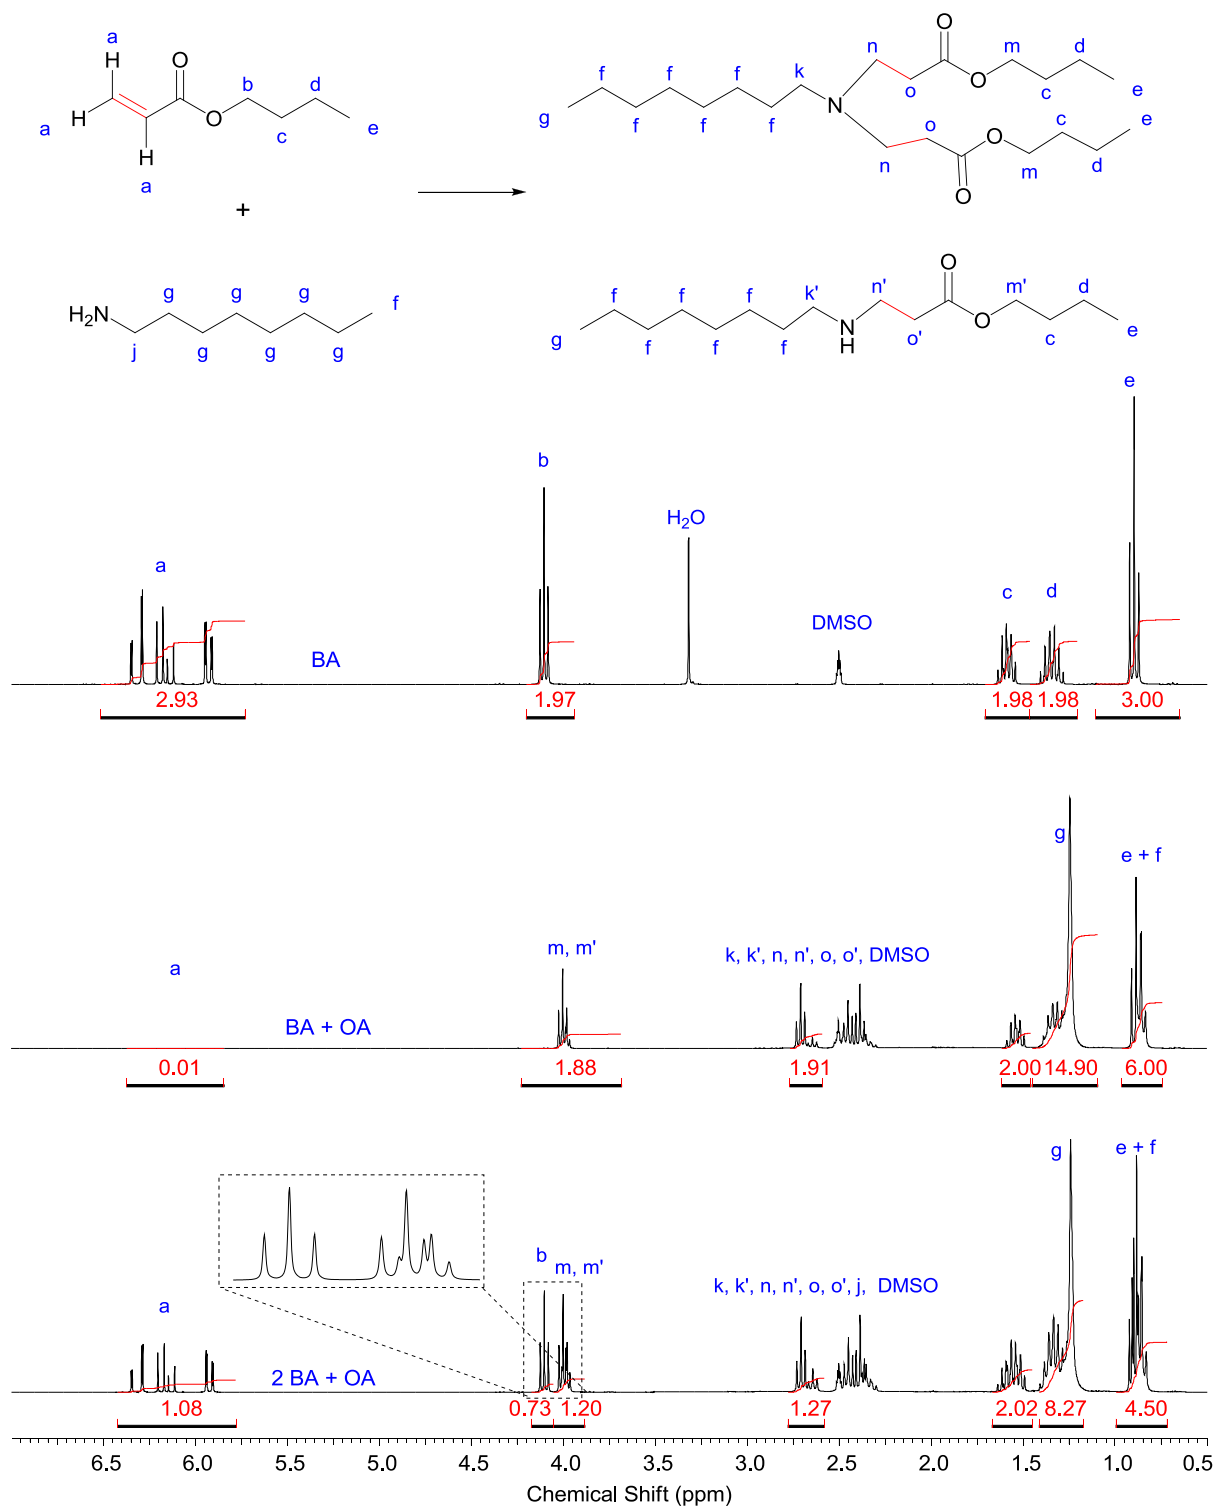

Fig. S21.  $^1\text{H}$  NMR spectra of *n*-butyl acrylate (BA), and the reaction mixture of *n*-butyl acrylate and *n*-octylamine (OA) with *n*-butyl acrylate:*n*-octylamine equal to 1:1 and 2:1 in DMSO- $d_6$  (BA concentration of 0.5M) after 30 hours. 100% and 64% of the acrylate groups were consumed for the (BA + OA) and (2 BA + OA) reactions, respectively.

## VII. Comparison of the rates of the reactions of *n*-octylamine with vinyl sulfone and acrylate in DMF and DMSO

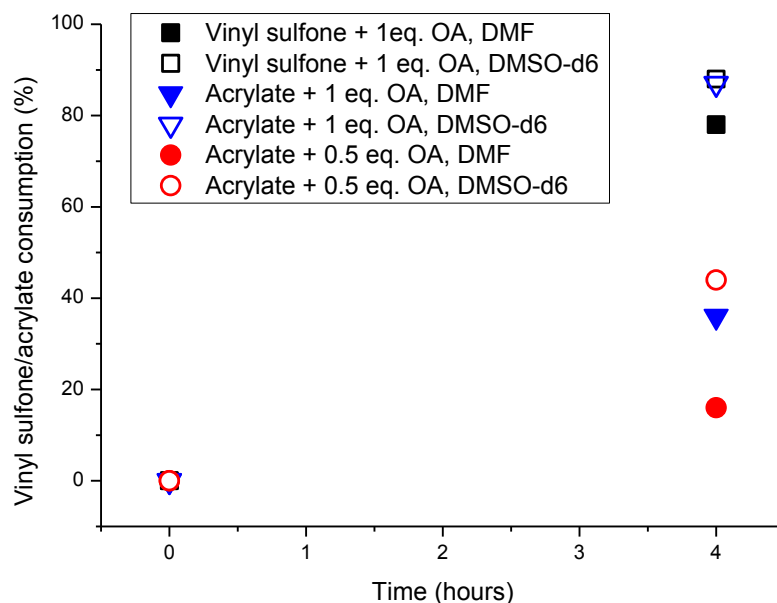

Fig. S22. Vinyl sulfone/acrylate consumption after 4 hours for the reactions of ethyl vinyl sulfone (5) and *n*-butyl acrylate (6) with *n*-octylamine (OA) conducted in DMF and DMSO-d<sub>6</sub>. The vinyl sulfone/acrylate consumption was determined by online FT-IR and <sup>1</sup>H NMR for reactions performed in DMF and DMSO-d<sub>6</sub>, respectively.

### References

- [1] R. M. LoPachin, T. Gavin, *Environ. Health Perspect.* **2012**, *120*, 1650-1657.
- [2] a) L. R. Domingo, P. Pérez, R. Contreras, *Tetrahedron* **2004**, *60*, 6585-6591; b) C.-G. Zhan, J. A. Nichols, D. A. Dixon, *The Journal of Physical Chemistry A* **2003**, *107*, 4184-4195.
